# Supplementary material for: Time-dependent entrainment of smoke presents an observational challenge for assessing aerosol–cloud interactions over the southeast Atlantic Ocean
Source: Copernicus journal article supplement (doi:10.5194/acp-2018-461), 2018-06-29
Supplement: Supplementary file [file acp-2018-461-AC2-supplement.pdf]

## **Authors' Response to Reviewers**

### **General comments:**

We would like to thank both reviewers for their thoughtful suggestions. We have revised the manuscript on the basis of this feedback and believe the revised product to be much clearer as a result. Specific changes and responses to the reviewer comments are outlined point-by-point below, with reviewer comments in red italicized font and the authors' response in black.

In addition to these changes, we have made an update to the data availability section (and a similar update in the Methods section and references) to reflect the fact that while the paper was undergoing review, the final DOI identifier became available for the ORACLES-2016 in situ data files (still provided by the NASA ESPO data archive). We have also expanded on the methods detailing how specific flight maneuvers were flagged (see revised page 4, lines 15-21) in response to several private inquiries and in further response to the main comment from Review 3 (our initial response reproduced below). Finally, Dr. Steve Abel has kindly pointed out in correspondence a typo in one of our equations — it has also been fixed in the revised manuscript (revised page 11, line 9).

### **RC1 (Reviewer 3):**

*Main comment: The authors show a significant contrast between Nd vs. BC CCN and Nd vs. AC CCN relationships in Figs. 1 and 2. I am a little concerned if the better correlation between Nd and BC CCN is partly due to the different definitions of AC and BC properties. It is defined in the text (Page 4) that AC properties are 100 m averages while the BC properties are 500 m averages. I think it is worth mentioning when presenting results that the amount of data for averaging is different for BC and AC properties. Have the authors tried comparing 100 m averages for both AC and BC properties? How much difference is it in terms of R<sup>2</sup>? (The results probably would not be qualitatively different given well-mixed condition in the boundary layer.)*

For our below cloud average, we use all non-cloudy data below 500 m: this sometimes yields data from 500 m to near-surface, but more often the P3 did not sample all the way to the near-surface. It would be difficult to restrict the below cloud averages to a 100 m vertical range consistently because the P3 did not always sample at the same altitude in the MBL. One idea could be to restrict the analysis to 100 m below cloud base, although the ambiguity in establishing the cloud base (which was generally not

as well defined as cloud top and complicated by the occasional presence of shallow cumulus below the Sc decks) was what led us to establish the “below 500 m” definition originally. When the analysis for Figure 1a is performed using the “100 m below cloud base” definition (defining “cloud base” simply as the lowest altitude observation with  $N_d > 10 \text{ cm}^{-3}$ ) the  $R^2$  is 0.62 and the slope is 0.43, not significantly different from the  $R^2$  of 0.73 and slope of 0.45 found in the original analysis. As pointed out above, and as can be seen in Figures 4 and 6, the MBL was generally well-mixed during ORACLES-2016 sampling, which does help explain why the results are fairly insensitive to the exact definition of the below cloud average. This may be a larger concern for follow-up analyses using ORACLES-2017, CLARIFY, and ORACLES-2018 data, as those campaigns observed decoupled MBLs much more frequently than ORACLES-2016 did.

We should also mention that despite generally averaging over a greater vertical distance, the exact number of 1 Hz observations that go into the averages is not necessarily greater for the below cloud than the above cloud leg because the P-3 may have spent more time just above cloud than below 500 m during a particular maneuver.

On the other end, we did experiment with increasing the vertical extent of the above cloud averages to 250 m and 360 m to better match the analyses of Costantino & Bréon (2010) and Rajapakshe et al. (2017), respectively. Correlations with  $N_d$  uniformly drop as the above cloud averaging distance increases for CCN,  $\text{SO}_4$ , and rBC. As mentioned on page 8, lines 15-17, one explanation for this is that the coarser average includes cases with narrow separations between the overlying aerosol and cloud tops.

*Specific comments: Page 2, Line 8-10: Potential edits: . . .reduce cloud fraction (Hansen et al., 1997; Ackerman. . .) by reducing stability and relative humidity of the PBL, whereas . . . (Johnson et al., 2004; Sakaeda . . .)*

Thank you for the citation suggestions — they have been incorporated.

*Page 2, Line 22: add “for clouds with little precipitation” after cloud*

We have replaced “may suppress precipitation” with “may suppress drizzle” in line 22.

*Page 7, Line 5-12: Some of the conclusions seem to be drawn from Table 1. Add citation somewhere in this paragraph, or simply add the values of  $R^2$  to Figure 2.*

Conclusions drawn very specifically from Table 1 have been updated to refer readers to the precise rows being discussed in the following paragraph. The  $R^2$  values for panels a)-e) in Figure 2 are provided in panel f), so the conclusions drawn in this paragraph are fully encapsulated within Figure 2's information. A specific reference to Figure 2f) for the  $R^2$  values and Table 1 for the rest of the statistics has been added.

*Page 8, Line 1: add "(Fig. 2b)" after August*

Updated.

*Page 8, Line 11-12: I am not sure I understand why the sequence of flight maneuvers suggests direct instantaneous smoke cloud contact*

This would perhaps be better illustrated by the full time-height profile of the 4 September flight, but the RMP observations with no above cloud gap precede both CLD legs, although there's a brief cloud "dip" and some above cloud sampling before the straight-and-level cloud legs technically begin. We have clarified this in the text. The profiles that show potential gaps were further removed from the in-cloud legs (there were below cloud legs in between).

*Page 12, Line 18: Zhao et al., 2017 is not in the reference.*

"Zhao" is a typo — thank you for catching the error. Zhou et al. (2017) is cited on page 18, lines 26-28.

## **RC2 (Reviewer 2):**

*Page 1, line 23: "Precipitation processes are also expected to obscure the relationship between above-cloud smoke and cloud properties in parts of the southeast Atlantic, although marine boundary layer carbon monoxide concentrations for two case study flights suggest that smoke entrainment history drove the observed differences in cloud properties for those days."*

*This sentence could be simplified for clarity; e.g.*

*"Precipitation processes can obscure the relationship between above-cloud smoke and cloud properties in parts of the southeast Atlantic, but marine boundary layer carbon monoxide concentrations for two case study flights suggest that smoke entrainment history drove the observed differences in cloud properties for those days."*

Thank you for the suggestion — it has been incorporated.

*Page 4, line 7: "... in situ data used is available at ..."*

*replace with*

*"... in situ data used are available at ..."*

Fixed.

*Page 5, line 15: "Only data from liquid clouds in the MBL (successful liquid cloud phase retrievals with effective temperatures below 280 K) ..."*

*Please specify what effective temperature is and adjust wording so that it is clear what "below" means (temperature or altitude).*

Clarified that the effective cloud top temperature must be warmer than 280 K and the cloud phase and effective cloud top temperature are retrieved from SEVIRI along with effective radius and cloud optical thickness.

*Page 7, line 18: "This indicates that variability in aerosol properties immediately above the MBL has little immediate impact on the microphysics of the clouds below."*

*This seems to follow from Table 1, Row 7, rather than from the context of this sentence.*

The whole paragraph has been updated to provide clearer references to Figure 2f and the appropriate rows of Table 1. The point of the line in question can be made equally well by comparing the coefficients of determination in rows 6 and 7 of Table 1 or by looking at the differences in the regression coefficients between the AC and BC values in rows 4 and 5.

*Page 8, line 26: "Observed CO (Fig. 6) is qualitatively consistent with the WRF-AAM output, with MBL average CO values on 31 August considerably above those from 4 September and among the highest seen during the deployment (all other flights shown in thin grey lines)."*

*It seems a bit too much to ask the reader to compare Fig. 5 b, c (WRF-AAM data) with Fig. 6 (ORACLES data) and to come to this conclusion. Please add, e.g., a time averaged vertical profiles of CO from Fig. 5 b, c to Fig. 6 to enable the comparison.*

The CO data from the model is only that specifically tagged to biomass burning emissions, versus the observations which are bulk measures of CO. Thus, the values are not directly comparable, which is why we specify the agreement is qualitative. However, it becomes quite clear from looking at the two figures that the day with higher model BB-tagged CO also has considerably higher observed CO.

*Page 12, line 7: "For instance, because the climatological MBL flow is southerly in the SEA, an instantaneous snapshot of smoke-cloud contact in the southern reaches of the domain may underestimate the microphysical effects by not accounting for their upstream manifestation. Similarly, apparently 'clean' cases in the northern part of the domain may have been polluted downstream, complicating efforts to compare 'mixed' and 'unmixed' statistics."*

*This sentence is a bit confusing. It seems to make more sense if "upstream" and "downstream" are switched.*

Thank you for this comment — the sentence has been significantly clarified by using geographic specifiers in lieu of upstream/downstream.

# Time-dependent entrainment of smoke presents an observational challenge for assessing aerosol–cloud interactions over the southeast Atlantic Ocean

Michael S. Diamond<sup>1</sup>, Amie Dobracki<sup>2</sup>, Steffen Freitag<sup>2</sup>, Jennifer D. Small Griswold<sup>3</sup>, Ashley Heikkilä<sup>3</sup>,  
5 Steven G. Howell<sup>2</sup>, Mary E. Kacarab<sup>4</sup>, James R. Podolske<sup>5</sup>, Pablo E. Saide<sup>6,7</sup>, and Robert Wood<sup>1</sup>

<sup>1</sup>Department of Atmospheric Sciences, University of Washington, Seattle, Washington, USA.

<sup>2</sup>Department of Oceanography, University of Hawai'i at Mānoa, Honolulu, Hawai'i, USA.

<sup>3</sup>Department of Atmospheric Sciences, University of Hawai'i at Mānoa, Honolulu, Hawai'i, USA.

<sup>4</sup>School of Earth and Atmospheric Sciences, Georgia Institute of Technology, Atlanta, Georgia, USA.

10 <sup>5</sup>NASA Ames Research Center, Moffett Field, California, USA.

<sup>6</sup>Department of Atmospheric and Oceanic Sciences, University of California, Los Angeles, California, USA.

<sup>7</sup>National Center for Atmospheric Research, Boulder, Colorado, USA.

*Correspondence to:* Michael S. Diamond (diamond2@uw.edu)

**Abstract.** The collocation of clouds and smoke over the southeast Atlantic Ocean during the southern African biomass burning  
15 season has numerous radiative implications, including microphysical modulation of the clouds if smoke is entrained into the  
marine boundary layer. NASA's Observations of Aerosols above CLouds and their interactionS (ORACLES) campaign is  
studying this system with aircraft in three field deployments between 2016 and 2018. Results from ORACLES-2016 show that  
the relationship between cloud droplet number concentration and smoke below cloud is consistent with previously reported  
values, whereas cloud droplet number concentration is only weakly associated with smoke immediately above cloud at the  
20 time of observation. Combining field observations, regional chemistry–climate modeling, and theoretical boundary layer  
aerosol budget equations, we show that the history of smoke entrainment (which has a characteristic mixing timescale on the  
order of days) helps explain variations in cloud properties for similar instantaneous above-cloud smoke environments.

Precipitation processes can obscure the relationship between above-cloud smoke and cloud properties in parts of the southeast  
Atlantic, but marine boundary layer carbon monoxide concentrations for two case study flights suggest that smoke entrainment  
25 history drove the observed differences in cloud properties for those days. A Lagrangian framework following the clouds and  
accounting for the history of smoke entrainment and precipitation is likely necessary for quantitatively studying this system:  
an Eulerian framework (e.g., instantaneous correlation of A-train satellite observations) is unlikely to capture the true extent  
of smoke–cloud interaction in the southeast Atlantic.

## 1 Introduction

30 From June to October, fires spread across southern Africa produce more than a quarter of global carbon emissions from  
biomass burning (Roberts et al., 2009; van der Werf et al., 2010). The resulting smoke is frequently transported westward over

**Formatted:** Font: Not Italic

**Deleted:** Precipitation processes are also expected to obscure the relationship between above-cloud smoke and cloud properties in parts of the southeast Atlantic, although marine boundary layer carbon monoxide concentrations for two case study flights suggest that smoke entrainment history drove the observed differences in cloud properties for those days

the southeast Atlantic Ocean (SEA) in association with the northern branch of the deep anti-cyclone over southern African and the Southern African Easterly Jet (Adebiyi & Zuidema, 2016; Garstang et al., 1996).

5 Low-level stratocumulus (Sc) clouds are abundant over the SEA due to strong lower tropospheric stability (LTS) from subsidence and low sea-surface temperatures (Klein & Hartmann, 1993; Seager et al., 2003). The collocation of the plume of biomass burning aerosol (BBA) and clouds over the SEA has important radiative implications that depend on the vertical distribution of the smoke and clouds (Koch & Del Genio, 2010). The direct radiative effect of the smoke can be positive or negative depending on the underlying surface (Chand et al., 2009). If BBA is near Sc clouds, rapid cloud adjustments to the BBA direct effect, or semi-direct effects, can reduce cloud fraction (Hansen et al., 2007; Ackerman et al., 2000), whereas  
10 smoke further aloft warms the free troposphere (FT), increasing LTS and thus Sc cloud fraction and thickness (Johnson et al., 2004; Sakaeda et al., 2011; Wilcox, 2010; Wilcox, 2012).

Recent observations of smoke aerosol in the boundary layer at Ascension Island during the Layered Atlantic Smoke Interactions with Clouds (LASIC) ARM Mobile Facility deployment make clear that smoke is mixing into the marine boundary  
15 layer (MBL) in the SEA (Zuidema et al., 2018). When smoke mixes into the Sc clouds, a number of changes in cloud microphysical properties, or indirect effects, can result. For a given liquid water path (LWP), increasing the availability of aerosols that act as cloud condensation nuclei (CCN) increases the cloud droplet number concentration ( $N_d$ ) and decreases the cloud effective radius ( $r_e$ ): this “Twomey effect” increases the cloud albedo and thus produces a negative radiative forcing (Twomey, 1974). Rapid cloud adjustments to the Twomey effect can either enhance or counteract this negative radiative  
20 forcing. For instance, the shift in the cloud droplet distribution toward smaller droplets may suppress drizzle (Albrecht, 1989); alternatively, the smaller droplets may evaporate more rapidly, increasing cloud-top entrainment and drying out the cloud (Wood 2007). This study will focus primarily on processes controlling the Twomey effect.

Previous observational work in this area has used the “A-train” constellation of satellites, which obtain data that is nearly  
25 spatially and temporally coincident, to evaluate cloud response to BBA statistically. One method is to determine the slope of the logarithmic relationship between  $N_d$ , or  $r_e$  if LWP is assumed fixed, and CCN (or a proxy like aerosol number concentration):

$$g = \frac{\partial \ln(N_d)}{\partial \ln(CCN)} = -3 \frac{\partial \ln(r_e)}{\partial \ln(CCN)}. \quad (1)$$

When clouds and smoke appear to be in contact, the linear slope of the logarithmic relationship between  $r_e$  and the aerosol  
30 index (AI), a proxy for aerosol concentration, has been estimated between -0.24 (Costantino & Bréon, 2010) and -0.15 (Costantino & Bréon, 2013), corresponding to values of 0.72 and 0.45 for the  $N_d$ -CCN relationship ( $g$ ), within the range of previously calculated values for aerosol enhancement of  $N_d$  (e.g., 0.71 in Kaufman et al., 1991; 0.5 in Nakajima et al., 2001). In contrast,  $r_e$  and AI are uncorrelated when smoke and clouds are vertically well-separated.

Deleted: precipitation

Painemal et al. (2014) also find evidence suggestive of a measurable Twomey effect due to smoke in the SEA, although largely limited to the region north of 5° S. In this region,  $r_e$  and cloud top height are anti-correlated. The authors interpret this as evidence that deeper clouds are more likely to be in contact with the overlying biomass burning layer, although the aerosol base height as derived from the Cloud–Aerosol Lidar with Orthogonal Polarization (CALIOP) often shows separation between aerosol layer base and the cloud top height. Because the absorbing smoke particles attenuate the 532 nm CALIOP beam, the standard retrieval for aerosol base height is biased high, which may explain this discrepancy (Painemal et al., 2014; Rajapakshe et al., 2017).

Further complicating our understanding of the vertical distribution of BBA, models tend to show smoke subsiding rapidly over the SEA, whereas CALIOP observations show the plume staying at altitude for a much greater distance over the ocean (Das et al., 2017). The difficulty in reliably determining the lowest extent of the BBA plume is a large source of uncertainty regarding the strength and sign of BBA semi-direct and indirect effects over the SEA.

An implicit assumption made in the use of A-train observations is that in cases of smoke–cloud contact, the smoke is relatively well-mixed in the MBL at the time of observation. However, the process of cloud-top entrainment that mixes the FT smoke down into the MBL is not instantaneous. In idealized large eddy simulation models with smoke initially above clouds, it takes ~1–1.5 days after smoke–cloud contact for  $N_d$  to level off at the CCN concentration of the smoke aloft (Yamaguchi et al., 2015; Zhou et al., 2017). Calculations of entrainment timescale presented below suggest these values may be toward the faster end of what can be expected.

In this paper, we present new aircraft observations of clouds and BBA over the SEA region that show considerable variation in  $N_d$  for very similar vertical distributions of BBA, calling into question the idea that MBL and FT BBA concentrations are in equilibrium. As a result, estimates of the magnitude of the radiative forcing from aerosol–cloud interactions ( $RF_{ACI}$ ) due to smoke over the SEA may be misleading without considering the transport history of the MBL air to assess for how long it has been entraining smoke. We suggest that failing to account for the relatively long timescale for entrainment – e.g., by using instantaneous correlations between above-cloud BBA and cloud properties – can obscure the true extent of microphysical modification of SEA stratocumulus by smoke.

## 2 Data and methods

### 2.1 ORACLES–2016 flights

The first deployment of the NASA ObserVations of Aerosols above CLouds and their intEractionS (ORACLES) aircraft campaign, based out of Walvis Bay, Namibia (23.0° S, 14.5° E), took place during September 2016 (Zuidema et al., 2016).



ORACLES aims to characterize the aerosol–cloud system over the SEA throughout the biomass burning season; the second deployment, based out of São Tomé and Príncipe (0.3° N, 6.7° E), was completed in August 2017 and a third deployment is planned for October 2018. This study uses data acquired during the September 2016 field deployment (ORACLES-2016) from the P-3 Orion aircraft (P-3), a four-engine turboprop plane that can sample in situ from the top of the aerosol plume (~6 km maximum) to ~100 m above the ocean surface.

All ORACLES-2016 science flights with valid data are included in this analysis: all P-3 in situ data used are available from the NASA Ames Earth Science Project Office (ESPO) Data Archive at [http://dx.doi.org/10.5067/Suborbital/ORACLES/P3/2016\\_V1](http://dx.doi.org/10.5067/Suborbital/ORACLES/P3/2016_V1) (ORACLES Science Team, 2017). In addition, the 31 August (flight number PRF02-2016) and 4 September (PRF04-2016) flights are analyzed in greater detail as illustrative cases.

We use data from four specific flight maneuvers: ramps (RMP), in which the P-3 ascends or descends while continuing to travel horizontally; square spirals (SQS), in which the P-3 ascends or descends while spiraling over a fixed horizontal point; sawtooth legs (SAW), in which the P-3 porpoises through a cloud layer to sample air below, above, and within the clouds; and straight and level in-cloud legs (CLD). Flight maneuvers were flagged manually following notes taken by the mission scientist of each research flight, aircraft geolocation data, and in situ cloud and smoke properties when available. Ramps and square spirals were generally defined to span at least a 2 km difference in altitude, although exceptions were made for shorter segments that sampled important gradients, such as within plume to above plume or MBL to above cloud (if a sufficient amount of above-cloud air was sampled). Ascents taking off from and descents landing at Walvis Bay were not classified as ramps for the purposes of this analysis. Flight legs were generally designed to last at minimum 2 minutes and preferably between 5 and 20 minutes.

For in-cloud legs, we accept data 5 minutes before/after the beginning/end of the leg for our above cloud (AC) and below cloud (BC) properties. We define AC properties as the mean value of a quantity between cloud top and 100 m above cloud top, adopting the 100 m value from Costantino & Bréon (2013) for satellite derived BBA–cloud contact. It should be noted that our AC values are only for the immediately above-cloud BBA and are not intended to be representative of aerosol higher in the BBA plume. We define BC averages as the mean value of a quantity below 500 m. Although we expect most MBLs in our study area to be shallow and well-mixed, as is the case on both case study flights (31 August and 4 September), this introduces some uncertainty in the case of deeper, decoupled MBLs (Jones et al., 2011).

## 30 2.2 Cloud observations

Measurements of the cloud droplet number size distribution from 3 to 500  $\mu\text{m}$  in diameter were made by an Artium Flight Phase Doppler Interferometer (PDI) vertically mounted on a wing of the P-3 (Chuang et al., 2008). As droplets pass through the intersection of the PDI's two identical lasers, they act as lenses and refract light, producing a phase shift between the fringe

Deleted: is

Deleted: [espoarchive.nasa.gov](http://espoarchive.nasa.gov)

patterns from the lasers that has a nearly linear dependence on droplet diameter. For further details on the PDI instrument and methodology, the reader is directed to Chuang et al. (2008).

We calculate  $N_d$ ,  $r_e$ , and liquid water content (LWC) from the PDI's cloud droplet spectrum as follows:

$$5 \quad N_d = \int_0^{\infty} n(r) dr \approx \sum_{i=1}^{128} n(r_i), \quad (2)$$

$$r_e = \frac{\int_0^{\infty} r^3 n(r) dr}{\int_0^{\infty} r^2 n(r) dr} \approx \frac{\sum_{i=1}^{128} r_i^3 n(r_i)}{\sum_{i=1}^{128} r_i^2 n(r_i)}, \quad (3)$$

$$LWC = \frac{4\pi}{3} \rho_w \int_0^{\infty} r^3 n(r) dr \approx \frac{4\pi}{3} \rho_w \sum_{i=1}^{128} r_i^3 n(r_i), \quad (4)$$

where  $n(r)$  is the number of cloud droplets in a particular size bin,  $r_i$  is the mean radius value for each of the PDI's 128 size bins, and  $\rho_w$  is the density of liquid water.  $N_d$  and  $r_e$  averages are weighted by LWC; for  $N_d$ , this weighting reduces the impact of cloud edges to better represent the typical adiabatic cloud profile in which  $N_d$  does not vary with altitude (Martin et al., 1994), whereas for  $r_e$ , this weighting emphasizes values higher in the cloud profiles, which are more comparable to that retrieved via satellite remote sensing (Nakajima & King, 1990). We then define a simple cloud mask,  $N_d > 10 \text{ cm}^{-3}$ , that we apply before taking any averaged cloud or above and below cloud aerosol data. Mid-level clouds (defined here as any cloud observation above 3 km) are excluded from the analysis.

15 Remotely sensed  $r_w$ , cloud optical thickness (COT), cloud phase, and effective cloud top temperature are retrieved by the NASA Langley Research Center from the Spinning Enhanced Visible and Infrared Imager (SEVIRI) aboard the geostationary Meteosat-10 satellite and  $N_d$  is calculated assuming an adiabatic-like vertical stratification (Painemal et al., 2012; Painemal & Zuidema, 2011):

$$20 \quad N_d = 1.4067 \times 10^{-6} \left[ \text{cm}^{-1/2} \right] \text{COT}^{1/2} r_e^{-5/2}. \quad (5)$$

Only data from liquid clouds in the MBL (successful liquid cloud phase retrievals with effective cloud top temperatures warmer than 280 K) are maintained for this analysis. For each flight analyzed, SEVIRI quantities are averaged over a  $0.5^\circ$  by  $0.5^\circ$  grid box centered at the P-3's location every 15 minutes. The flight average quantity is then the average of all the 15 minute values.

### 2.3 Smoke and aerosol observations

25 CCN concentrations at 0.3% supersaturation were measured by a Droplet Measurement Technologies CCN-100 continuous-flow streamwise thermal-gradient CCN chamber onboard the P-3 (Roberts & Nenes, 2005). Sulfate ( $\text{SO}_4$ ) mass concentration was measured by an Aerodyne Aerosol Mass Spectrometer (AMS) operating in V-mode (Canagaratna et al., 2007). CCN and  $\text{SO}_4$  measurements provide information about the total amount of hygroscopic aerosol available from sea spray, secondary production, and transport from the continent.

Deleted: and

Deleted: below

Refractory black carbon (rBC) from 53 to 524 nm mass equivalent diameter was measured using a Droplet Measurement Technologies single particle soot photometer (SP2) with a solid diffuser inlet outside the front cabin of the P-3 (Schwarz et al., 2006; Stephens et al., 2003). The SP2 uses laser–incandescence to identify refractory particles and was calibrated using  
5 fullerene soot effective density estimates from Gysel et al. (2011). More information about the laser-induced incandescence technique is provided by Stephens et al. (2003) and details of the SP2 in particular can be found in Schwartz et al. (2006).

Because rBC is formed by the incomplete combustion of organic material, it is an unambiguous indicator of non-marine aerosol (in our case, primarily smoke) and is accompanied by other combustion products, including carbon monoxide (CO) and organic  
10 aerosol (Bond et al., 2013; Shank et al., 2012).

In this study, we primarily use the rBC number concentration as a proxy for smoke concentration, bearing in mind the undercounting of rBC cores below 80 nm in diameter (Schwarz et al., 2010). We additionally use CO concentrations measured by an ABB/Los Gatos Research CO/CO<sub>2</sub>/H<sub>2</sub>O Analyzer (Liu et al., 2017) as an indicator of smoke presence that is not affected  
15 by rapid removal processes like precipitation.

#### 2.4 Model output

Trajectories initialized at 250 m (988 hPa) in the center of the P-3 flight track (15° S, 5° E) at 12 UTC for both the 31 August and 4 September flights were run backward isobarically for 5 days using the Hybrid Single Particle Lagrangian Integrated  
20 Trajectory Model (HYSPLIT) with Global Data Assimilation System meteorology on a 0.5° by 0.5° grid (Stein et al., 2015).

Data from forecasts of the Weather Research and Forecasting model (WRF) configured with aerosol-aware microphysics (AAM; Thompson & Eidhammer, 2014) used for flight planning during the ORACLES-2016 deployment are analyzed along the track of each trajectory to assess the transport history and degree of smoke interaction prior to sampling. WRF–AAM was  
25 configured similarly to Saide et al. (2016) with a 12 km resolution domain over most of Africa and the Atlantic using daily Quick Fire Emission Dataset (Darmenov & da Silva, 2015) biomass burning emissions constrained in near-real time with satellite aerosol optical depth from the NASA neural network retrieval (Colarco et al., 2017). The forecasts include CO-tagged tracers for smoke emissions. The initial 24 hours of each daily forecast were combined to perform this analysis.

### 3 Results

#### 3.1 Relationship between above- and below-cloud aerosol and cloud microphysics

Using data from all 13 ORACLES-2016 flights with measurements, cloud microphysical properties correlate well with CCN and our smoke proxies in the MBL but poorly in the FT. Figure 1 shows mean  $N_d$  plotted against mean above- and below-  
5 cloud CCN concentrations for all flight maneuvers with valid data. Means and 95% confidence intervals (parentheses) for the relevant parameters of all ordinary least squares (OLS) regressions (Seabold & Perktold, 2010) are determined via bootstrapping and are reported in Table 1. In the MBL,  $\ln(\text{CCN})$  and  $\ln(N_d)$  correlate well, with a coefficient of determination ( $R^2$ ) of 0.73 (0.50–0.89). The slope of the  $\ln(N_d)$ – $\ln(\text{CCN})$  relationship,  $g$ , is 0.45 (0.31–0.60), in good agreement with the  
10 previously estimated values discussed above. In contrast, the correlation in the FT seems surprisingly weak in light of the previous A-train findings above that assume, to some degree, that aerosol–cloud contact means significant mixing, with an  $R^2$  of 0.32 (0.01–0.74). The above-cloud  $\ln(N_d)$ – $\ln(\text{CCN})$  slope,  $g$ , is 0.16 (0.02–0.30), considerably smaller than in the MBL and barely distinguishable from zero at the 95% confidence level.

To explore this apparent discrepancy further, we perform linear OLS regressions to predict  $N_d$  using  $\text{SO}_4$ , which is a significant  
15 contributor to both marine and continental CCN, and rBC, which should serve as an unambiguous tracer of smoke. Figure 2 shows the results using (a) all variables (AC and BC  $\text{SO}_4$  and rBC), (b) only AC and BC  $\text{SO}_4$ , (c) only AC and BC rBC, (d) only BC  $\text{SO}_4$  and rBC, and (e) only AC  $\text{SO}_4$  and rBC. The  $R^2$  for each regression is shown in Fig. 2f and full statistics are provided in Table 1.  $\text{SO}_4$  is a better predictor of  $N_d$  than rBC alone, which is expected as  $\text{SO}_4$  may be contributing to CCN from both “natural” marine and “polluted” continental sources whereas rBC is only a component of a subset of the continental  
20 CCN, although the combination of the two adds predictive power. The decent correlation of rBC and  $N_d$  provides evidence for the influence of smoky continental air on the marine cloud microphysical properties beyond changes in meteorology and marine aerosol sources.

Interestingly, the regression using only the BC values of  $\text{SO}_4$  and rBC (Fig. 2f, Table 1, row 6) is nearly as skillful as the full  
25 regression (Fig. 2f, Table 1, row 3) whereas the regression using only the AC values (Fig. 2f, Table 1, row 7) has comparatively little skill. Moreover, although the coefficients for the regressions including both  $\text{SO}_4$  and rBC are not reliable given their mutual correlation (and are provided primarily for the sake of reproducibility), the coefficients of the regressions using only  $\text{SO}_4$  (Table 1, row 4) or rBC (Table 1, row 5) also reveal that those regressions are driven by the BC values. This indicates that variability in aerosol properties immediately above the MBL has little immediate impact on the microphysics of the clouds  
30 below.

Formatted: Superscript

### 3.2 Case study: Comparison of 31 August and 4 September flights

To illustrate the phenomenon of similar above-cloud aerosol profiles leading to different MBL properties, we focus on the two flights highlighted in Fig. 2: 31 August (reds) and 4 September (blues). Figure 3 shows the mean location and Table 2 reports the starting and ending latitude, longitude, and time for each flight maneuver analyzed. As can be seen both in Fig. 2 and the SEVIRI  $N_d$  imagery in Fig. 3, the 31 August clouds had some of the highest  $N_d$  observed in the ORACLES-2016 deployment, whereas the 4 September clouds were on the lower- $N_d$  end of the spectrum.

Figure 4 explores each flight maneuver on the two days in more depth, showing (a) vertical profiles (lines) of rBC and cloud top height (vertical placement of markers) for RMP and SQS legs and (b) the full cloud droplet spectra for CLD and SAW legs. Focusing first on the vertical smoke profiles, rBC concentrations were generally higher just above cloud top on 4 September than they were on 31 August, yet MBL concentrations of rBC were  $\sim 5$  times greater on 31 August. Cloud properties (horizontal placement of markers) tell a similar story, with  $N_d$  values from 31 August well above those from 4 September. Even within the profiles on 31 August, higher above-cloud rBC values do not necessarily correspond to higher  $N_d$ . Particularly high  $SO_4$  values on 31 August (Fig. 2b) likely contributed to the incredibly high  $N_d$  of some profiles (e.g., the  $\sim 700 \text{ cm}^{-3}$  observed for RMP1) but do not account for the difference in MBL rBC between the days.

There is an  $\sim 100 \text{ m}$  “clear air slot” (Hobbs, 2003), or gap, between the bottom of the aerosol plume and cloud tops for RMP4 on 4 September, and a similar drop-off in smoke just above cloud for RMP2, but the RMP1 and RMP3 profiles for that flight show direct instantaneous contact. The narrow gap distance for RMP2 and RMP4 suggests the 100 m threshold for cloud-aerosol “contact” of Costantino & Bréon (2013) may exclude observations that the 250 m and 360 m thresholds of Costantino & Bréon (2010) and Rajapakshe et al. (2017), respectively, would inadvertently include as “mixed” cases.

For the CLD and SAW legs that allowed for more time in cloud, we show the averaged cloud droplet spectra (curves) along with average  $N_d$  and  $r_e$  (ticks) in Fig. 4(b). CLD1 and CLD2 follow RMP1 and RMP3, respectively, on 4 September (Fig. 3), with above-cloud legs with some cloud “dips” immediately preceding the CLD legs suggesting similar direct instantaneous smoke-cloud contact for those legs. Again, the 31 August flight shows much clearer evidence of MBL pollution, with droplet spectra shifted toward smaller drop sizes and higher concentrations, and thus higher  $N_d$  and lower  $r_e$ , as compared with the 4 September values. This result is consistent with the SEVIRI  $N_d$  values (stars), although SEVIRI  $N_d$  is systematically lower than the in situ values for both days. The presence of overlying aerosol can create a low bias in remotely sensed COT without having a large effect on remotely sensed  $r_e$  (Haywood et al., 2004; Wilcox et al., 2009), leading to an expected low bias in  $N_d$ .

Whereas the vertical profiles of BBA in Fig. 4(a) look fairly comparable, the WRF-AAM curtains along the HYSPLIT back trajectories shown in Fig. 5 reveal considerable variation in the histories of smoke-cloud contact between the two cases. The

Deleted: immediately

Deleted: ing

250 m trajectories both originate in the Southern Ocean 5 days before sampling but differ markedly in the smoke environments they encountered before being sampled, as shown in the curtain plots of WRF–AAM biomass burning CO concentrations for 31 August in Fig. 5(b) and 4 September in Fig. 5(c). The MBL sampled on 31 August appears to have been in contact with smoke for several days beforehand, whereas the MBL on 4 September was overlain with clean air until ~1.5 days before sampling. Given the sharp gradient at the lower boundary of the smoke plume seen in both the observations and the model output, direct contact may have been even more limited. Observed CO (Fig. 6) is qualitatively consistent with the WRF–AAM output, with MBL average CO values on 31 August considerably above those from 4 September and among the highest seen during the deployment (all other flights shown in thin grey lines).

## 10 4 Discussion

### 4.1 Timescales for the entrainment of free tropospheric CCN

The importance of the different entrainment histories of the 31 August and 4 September cases, and implications for the SEA region more generally, can be illuminated using an idealized framework. Assuming no other source or sink terms besides FT entrainment and that entrainment is in approximate balance with large-scale subsidence, the rate of increase in MBL CCN concentrations,  $CCN_{MBL}$ , for a constant exposure to a directly-above-cloud FT CCN concentration,  $CCN_{FT}$ , can be expressed as:

$$\frac{\partial CCN_{MBL}}{\partial t} = \frac{w_e}{z_i} (CCN_{FT} - CCN_{MBL}), \quad (6)$$

where  $w_e$  is the entrainment rate,  $z_i$  is the height of the MBL, and  $t$  is time (Wood et al., 2012). This equation has a characteristic e-folding timescale ( $\tau_{ent}$ ) for  $CCN_{MBL}$  to equilibrate with  $CCN_{FT}$ :

$$\tau_{ent} = \frac{z_i}{w_e}. \quad (7)$$

For a typical entrainment rate of  $0.4 \text{ cm s}^{-1}$  (Faloona et al., 2005; Wood & Bretherton, 2004) and MBL height of 1 km, the characteristic timescale is ~3 days for the CCN concentration in the MBL to reach equilibrium with FT levels. This estimate is in line with previous values of, e.g., ~4 days for the northeast Atlantic (Bretherton et al., 1995) and ~3 days for the tropical Pacific (Simpson et al., 2014). Figure 7(a) shows that for a plausible range of  $w_e$  from  $0.2\text{--}0.7 \text{ cm s}^{-1}$  (Faloona et al., 2005) and  $z_i$  from 500–1500 m, the characteristic e-folding timescale for entrainment mixing of MBL and FT air varies from approximately one day to one week.

To illustrate the effects of both differing entrainment mixing timescales and sampling at different times along the MBL evolution, we conduct a thought experiment in which an MBL in equilibrium with a “clean” FT with  $CCN_{FT} = 100 \text{ cm}^{-3}$  is exposed to smoky FT air with  $CCN_{FT} = 1000 \text{ cm}^{-3}$  for three days, after which “clean” FT conditions return. Figure 7(b) shows

the results of this scenario with an MBL with  $z_i = 1$  km and a range of  $w_e$  values. Three main features stand out: 1) for any given entrainment timescale, the strength of the aerosol–cloud interactions estimated from a single snapshot during smoke contact will depend heavily on the time of observation; 2) for any given point in time, the entrainment rate can cause up to a factor of 2 difference in  $CCN_{MBL}$ ; and 3) for all but the most rapidly entraining cases, MBLs remain more polluted 24 hours after exposure to smoke than they were after the first 24 hours of smoke exposure.

#### 4.2 Effects of precipitation

The real situation in the SEA is more complicated than the equations presented here because it is unrealistic to expect  $CCN_{FT}$  to remain constant over long time periods and large spatial gradients and precipitation/coalescence scavenging acts as a sink for CCN that is unaccounted for above, among other issues. Precipitation, in particular, has been shown to be a primary driver of regional and seasonal  $N_d$  variability in subtropical Sc decks (Mohrmann et al., 2017; Wood et al. 2012) and even moderate amounts of drizzle can rapidly deplete an MBL of CCN (Wood, 2006).

To assess how the inclusion of precipitation processes affects the discussion of entrainment above, we adapt a fuller Lagrangian MBL CCN budget equation from Wood et al. (2012) and Mohrmann et al. (2017):

$$\frac{d}{dt} CCN_{MBL} = \dot{CCN}_{FT} + \dot{CCN}_{SS} + \dot{CCN}_{Growth} + \dot{CCN}_{Precip} + \dot{CCN}_{Dry}, \quad (8)$$

where the subscript *FT* refers to entrainment of air from the free troposphere (Eq. 6), *SS* to sea spray, *Growth* to growth in the MBL from secondarily produced and other small particles to CCN-active sizes, *Precip* to precipitation/coalescence scavenging, and *Dry* to dry deposition. As in Wood et al. (2012) and Mohrmann et al. (2017), we eliminate the growth and dry deposition terms because of their uncertain formulations and negligible contributions to the total CCN budget.

Following Wood (2006), the loss of CCN due to coalescence scavenging is given by:

$$\dot{CCN}_{Precip} = -\frac{K P_{CB} h}{z_i} N_d, \quad (9)$$

where  $K (= 2.25 \text{ m}^2 \text{ kg}^{-1})$  is a constant that depends on the collection efficiency of drizzle drops,  $P_{CB}$  is the precipitation rate at cloud base, and  $h$  is the cloud thickness. This formulation assumes that the accretion of cloud droplets onto drizzle drops (coalescence) is the primary sink of CCN, rather than non-activated MBL CCN being washed out by falling rain, which is true for the lightly drizzling Sc decks. Even if the drizzle does not reach the ocean surface, CCN are lost because thousands of cloud drops can be collected together and evaporate in the MBL to form one larger haze particle, conserving mass but depleting aerosol number. For an appropriate supersaturation, we can assume  $N_d$  and  $CCN_{MBL}$  are approximately equal.

Deleted :

To complete our CCN budget equation, we account for sea spray as:

$$\dot{CCN}_{SS} = \frac{F(\sigma)U_{10}^{3.41}}{z_i}, \quad (10)$$

where  $F(\sigma)$  is a function of supersaturation and  $U_{10}$  is wind speed at 10 m (Clarke et al., 2006; Wood et al. 2012). We assume a supersaturation of 0.3%, corresponding to  $F(\sigma) = 214 \text{ m}^{-3} (\text{m s}^{-1})^{-2.41}$ , and a mean wind speed of  $7 \text{ m s}^{-1}$ , which is representative of the SEA.

We can now write the full Lagrangian CCN budget equation as:

$$\frac{DCCN_{MBL}}{Dt} = \frac{w_e + KP_{CB}h}{z_i} (CCN_{eq} - CCN_{MBL}), \quad (11a)$$

$$CCN_{eq} = \frac{CCN_{FT} + \frac{F(\sigma)U_{10}^{3.41}}{w_e}}{1 + \frac{KP_{CB}h}{w_e}}, \quad (11b)$$

where  $CCN_{eq}$ , which accounts for the sea spray source and the precipitation sink, has taken the place of  $CCN_{FT}$  from earlier. By adding precipitation, the equilibration timescale is reduced, as the timescales for FT entrainment and coalescence scavenging add in parallel:

$$\tau = \left( \frac{1}{\tau_{ent}} + \frac{1}{\tau_{precip}} \right)^{-1} = \frac{z_i}{w_e + KP_{CB}h}. \quad (12)$$

Figure 8(a) shows the full equilibration timescale for the same range of  $w_e$  as earlier and a range of  $P_{CB}$  from 0–1 mm day<sup>-1</sup>, assuming  $z_i = 1 \text{ km}$  and  $h = 300 \text{ m}$ . Although the timescale is reduced with increasing drizzle, the magnitude remains on the order of days for the precipitation values experienced in the Sc decks.

Figure 8(b) shows the full CCN budget equation applied to a case with  $CCN_{FT} = 1000 \text{ cm}^{-3}$ ,  $w_e = 0.4 \text{ cm s}^{-1}$ ,  $z_i = 1 \text{ km}$ ,  $h = 300 \text{ m}$ , and a range of  $P_{CB}$  values. Unsurprisingly, as precipitation increases, the equilibrium level of  $CCN_{MBL}$  is reduced regardless of how much smoke is present. However, the key features are qualitatively the same as in Fig. 7(b): 1) for any given precipitation rate, the strength of the estimated aerosol–cloud interactions will depend heavily on the time of observation; 2) for any given point in time, the precipitation rate can cause substantial differences in  $CCN_{MBL}$ ; and 3) for light drizzle, MBLs remain more polluted 24 hours after exposure to smoke than they were after the first 24 hours of smoke exposure.

Heavy drizzle was not observed on the 4 September flight, but instantaneous daytime precipitation measurements would not be sufficient as an indication of coalescence scavenging in any case given that Sc drizzle tends to peak overnight (Smalley & L'Ecuyer, 2015). Additionally, the association of high (low) precipitation with low (high)  $N_d$  suffers from ambiguous causality: the different precipitation rates may drive the  $N_d$  values, but alternatively the  $N_d$  values may drive the frequency and intensity of precipitation (i.e., precipitation suppression/lifetime effects). Without any additional information, it would be difficult to distinguish between the potential roles of precipitation versus entrainment history in explaining the vastly different MBL

Deleted: il



aerosol and cloud properties observed between 31 August and 4 September. Fortunately, for the ORACLES-2016 flights CO measurements can be invoked to resolve this ambiguity. Coalescence scavenging may have been the preferred explanation for the differences between 31 August and 4 September had the two days seen similar levels of MBL CO, which is not removed by precipitation processes. However, because MBL CO was much higher on 31 August than on 4 September (Fig. 6), the difference in smoke entrainment history is the most plausible cause of the differences in MBL aerosol loading and Na.

## 5 Summary and conclusions

Data from the September 2016 deployment of the ORACLES campaign show that the presence of smoke from biomass burning in southern Africa in the MBL is associated with cloud microphysical changes, but the presence of smoke near cloud top has little association by itself with the cloud properties below. This finding is illustrated by two flights that have similar vertical distributions of BBA but markedly different MBL pollution levels. Model results suggest that the MBL air sampled on 31 August had been in contact with smoke for a considerably longer time period than that sampled on 4 September. We argue that considering the prior history of the smoke and MBL air is key to understanding the large variations between cases with similar vertical profiles in the FT.

A serious treatment of the time-dependence of the entrainment process has a number of implications for studies that use a more instantaneous, or “Eulerian,” viewpoint, such as the A-train studies reviewed above. For instance, because the climatological MBL flow is southerly in the SEA, an instantaneous snapshot of smoke–cloud contact in the southern reaches of the domain may underestimate the microphysical effects by not accounting for their manifestation as the clouds and MBL smoke advect northward. Similarly, apparently “clean” cases in the northern part of the domain may have been polluted further south, complicating efforts to compare “mixed” and “unmixed” statistics.

Recent modeling work suggests that accurately characterizing  $RF_{ACI}$  is important for both regional and global estimates of radiative forcing: Lu et al. (2018) find that smoke over the SEA can produce a net  $-7$ – $8$   $W\ m^{-2}$  forcing, primarily due to the Twomey effect, which corresponds approximately to an appreciable  $-0.089$   $W\ m^{-2}$  forcing globally during the biomass burning season. Previous LES modeling of the Sc to cumulus transition also suggested that aerosol–cloud interactions over the SEA could contribute to net negative radiative forcings (Yamaguchi et al., 2015; Zhou et al., 2017). Inaccurate observational estimates of the magnitude of aerosol–cloud interactions over the SEA thus can greatly hinder our understanding of the magnitude and sign of the net radiative forcing of smoke over the SEA and how changes in southern African biomass burning may affect regional and global climate. Although fire activity in southern Africa has been increasing over the past decade in opposition to global trends of reduced burned area associated with anthropogenic land-use change (Andela et al., 2017), it is reasonable to expect that biomass burning may decrease in the future in response to concerns about the negative population health consequences of particulate matter due to fires (Johnston et al., 2012) and the possibility that smoke has been suppressing

Deleted: s

Deleted: which

Deleted: upstream

Deleted: downstream

Deleted: a

precipitation on the continent (Hodnebrog et al., 2016). Therefore, an accurate estimate of the climatic effects from a changing BBA loading over the SEA is highly societally relevant.

Future work is needed to assess to what extent a Lagrangian framework (Eastman & Wood, 2016; Mauger & Norris, 2010) accounting for the transport history of both the smoke and clouds differs from the traditional Eulerian framework in terms of estimated aerosol–cloud interactions. Of course, other sources and sinks of aerosols besides FT entrainment – e. g., precipitation – act on similar timescales and may be better understood in a Lagrangian framework as well. Combining observations with the history of air masses from models is likely necessary to understand MBL aerosol loading, and thus R<sub>FACT</sub> and resulting cloud adjustments.

#### 10 Data availability

All ORACLES-2016 in situ data used in this study are publicly available at [doi:10.5067/SUBORBITAL/ORACLES/P3/2016\\_V1](https://doi.org/10.5067/SUBORBITAL/ORACLES/P3/2016_V1).

Deleted:

Deleted: espoarchive.nasa.gov

#### Acknowledgements

ORACLES is funded by NASA Earth Venture Suborbital-2 grant NNX-15AF98G. We would like to thank the crew of the NASA P-3 Orion and our ORACLES-2016 pilots Michael Singer, Mark Russell, and Scott Farley in particular for their dedicated support and patience with our somewhat unorthodox flight requests. In addition, we thank [the NASA Ames Earth Science Project Office](#) for their invaluable support with field logistics and Jens Redemann for his steady leadership throughout the campaign.

Deleted: 's

20 The authors gratefully acknowledge the NOAA Air Resources Laboratory (ARL) for the provision of the HYSPLIT transport and dispersion model. We thank the SatCORPS team at NASA-LaRC (<https://satcorps.larc.nasa.gov/>) for the provision of Meteosat-10/SEVIRI retrievals. We would like to acknowledge high-performance computing support from Yellowstone (<ark:/85065/d7wd3xhc>) provided by NCAR's Computational and Information Systems Laboratory, sponsored by the National Science Foundation. The National Center for Atmospheric Research is sponsored by the National Science Foundation.

25 Michael Diamond's work was supported by NASA Headquarters under the NASA Earth and Space Science Fellowship Program, grant NNX-80NSSC17K0404, and by an American Meteorological Society Graduate Fellowship sponsored by NASA Earth Science.

Gregory Carmichael's contributions in generating the WRF-AAM output are greatly appreciated. Nikolai Smirnow was instrumental in collecting the rBC data used here. We thank Yohei Shinozuka for his stewardship of the ORACLES data and the provision of merged instrument data files. We would also like to thank [Steven Abel](#), Adeyemi Adebisi, Sarah Doherty, Siddhant Gupta, Johannes Mohrmann, Samuel Pennypacker, [Arthur Sedlacek](#), and the anonymous reviewers for their helpful comments and suggestions during the preparation and revision of this work and Paquita Zuidema for her detailed notes from the 4 September flight.

Deleted: and

## References

- Ackerman, A. S., Toon, O. B., Stevens, D. E., Heymsfield, A. J., Ramanathan, V., & Welton, E. J. (2000). Reduction of Tropical Cloudiness by Soot. *Science*, 288(1042), 1042-1047. doi:10.1126/science.288.5468.1042
- 10 Adebisi, A. A., & Zuidema, P. (2016). The role of the southern African easterly jet in modifying the southeast Atlantic aerosol and cloud environments. *Quarterly Journal of the Royal Meteorological Society*. doi:10.1002/qj.2765
- Albrecht, B. A. (1989). Aerosols, Cloud Microphysics, and Fractional Cloudiness. *Science*, 245, 1227-1230.
- Andela, N., Morton, D., Giglio, L., Chen, Y., van der Werf, G. R., Kasibhatla, P. S., . . . Randerson, J. T. (2017). A human-driven decline in global burned area. *Science*, 356, 1356-1362.
- 15 Bond, T. C., Doherty, S. J., Fahey, D. W., Forster, P. M., Berntsen, T., DeAngelo, B. J., . . . Zender, C. S. (2013). Bounding the role of black carbon in the climate system: A scientific assessment. *Journal of Geophysical Research: Atmospheres*, 118(11), 5380-5552. doi:10.1002/jgrd.50171
- Bretherton, C. S., Austin, P., & Siems, S. T. (1995). Cloudiness and Marine Boundary Layer Dynamics in the ASTEX Lagrangian Experiments. Part II: Cloudiness, Drizzle, Surface Fluxes, and Entrainment. *Journal of the Atmospheric Sciences*,
- 20 52(16), 2724-2735. doi:10.1175/1520-0469(1995)052<2724:cambld>2.0.co;2
- Canagaratna, M. R., Jayne, J. T., Jimenez, J. L., Allan, J. D., Alfarra, M. R., Zhang, Q., . . . Worsnop, D. R. (2007). Chemical and microphysical characterization of ambient aerosols with the Aerodyne aerosol mass spectrometer. *Mass Spectrom Rev*, 26(2), 185-222. doi:10.1002/mas.20115
- Chand, D., Wood, R., Anderson, T. L., Satheesh, S. K., & Charlson, R. J. (2009). Satellite-derived direct radiative effect of aerosols dependent on cloud cover. *Nature Geoscience*, 2(3), 181-184. doi:10.1038/ngeo437
- 25 Chuang, P. Y., Saw, E. W., Small, J. D., Shaw, R. A., Sipperley, C. M., Payne, G. A., & Bachalo, W. D. (2008). Airborne Phase Doppler Interferometry for Cloud Microphysical Measurements. *Aerosol Science and Technology*, 42(8), 685-703. doi:10.1080/02786820802232956
- Clarke, A. D., Owens, S. R., & Zhou, J. (2006). An ultrafine sea-salt flux from breaking waves: Implications for cloud condensation nuclei in the remote marine atmosphere. *Journal of Geophysical Research*, 111(D6). doi:10.1029/2005jd006565
- 30

- Colarco, P., V. Buchard, A. Darmenov, E. Nowottnick, A. da Silva, V. Aquila, H. Bian, P. Castellanos, M. Follette-Cook, and R. Govindaraju (2017), Update on the NASA GEOS-5 Aerosol Forecasting and Data Assimilation System, (<https://ntrs.nasa.gov/search.jsp?R=20170006600>)
- Costantino, L., & Bréon, F.-M. (2010). Analysis of aerosol-cloud interaction from multi-sensor satellite observations. *Geophysical Research Letters*, 37(11), L11801. doi:10.1029/2009gl041828
- 5 Costantino, L., & Bréon, F.-M. (2013). Aerosol indirect effect on warm clouds over South-East Atlantic, from co-located MODIS and CALIPSO observations. *Atmospheric Chemistry and Physics*, 13(1), 69-88. doi:10.5194/acp-13-69-2013
- Darmenov, A., and da Silva, A. M. (2015), The Quick Fire Emissions Dataset (QFED) - Documentation of versions 2.1, 2.2 and 2.4, NASA/TM-2015-104606, Vol. 38., (<http://gmao.gsfc.nasa.gov/pubs/tm/>), 183 pp
- 10 Das, S., Harshvardhan, Bian, H., Chin, M., Curci, G., Protonotariou, A. P., . . . Liu, X. (2017). Biomass burning aerosol transport and vertical distribution over the South African-Atlantic region. *Journal of Geophysical Research: Atmospheres*, 132. doi:10.1002/2016JD026421
- Eastman, R., & Wood, R. (2016). Factors Controlling Low-Cloud Evolution over the Eastern Subtropical Oceans: A Lagrangian Perspective Using the A-Train Satellites. *Journal of the Atmospheric Sciences*, 73(1), 331-351. doi:10.1175/jas-d-15-0193.1
- 15 Falooona, I., Lenschow, D. H., Campos, T., Stevens, B., van Zanten, M., Blomquist, B., . . . Gerber, H. (2005). Observations of Entrainment in Eastern Pacific Marine Stratocumulus Using Three Conserved Scalars. *Journal of the Atmospheric Sciences*, 62, 3268-3285.
- Garstang, M., Tyson, P. D., Swap, R., Edwards, M., Källberg, P., & Lindesay, J. A. (1996). Horizontal and vertical transport of air over southern Africa. *Journal of Geophysical Research: Atmospheres*, 101(D19), 23721-23736. doi:10.1029/95jd00844
- 20 Gysel, M., Laborde, M., Olfert, J. S., Subramanian, R., & Gröhn, A. J. (2011). Effective density of Aquadag and fullerene soot black carbon reference materials used for SP2 calibration. *Atmospheric Measurement Techniques*, 4(12), 2851-2858. doi:10.5194/amt-4-2851-2011
- Hansen, J., Sato, M., & Ruedy, R. (1997). Radiative forcing and climate response. *Journal of Geophysical Research: Atmospheres*, 102(D6), 6831-6864. doi:10.1029/96jd03436
- 25 Haywood, J. M., Osborne, S. R., & Abel, S. J. (2004). The effect of overlying absorbing aerosol layers on remote sensing retrievals of cloud effective radius and cloud optical depth. *Quarterly Journal of the Royal Meteorological Society*, 130(598), 779-800. doi:10.1256/qj.03.100
- Hobbs, P. V. (2003). Clean air slots amid dense atmospheric pollution in southern Africa. *Journal of Geophysical Research*, 30 108(D13). doi:10.1029/2002jd002156
- Hodnebrog, O., Myhre, G., Forster, P. M., Sillmann, J., & Samset, B. H. (2016). Local biomass burning is a dominant cause of the observed precipitation reduction in southern Africa. *Nat Commun*, 7, 11236. doi:10.1038/ncomms11236
- Johnson, B. T., Shine, K. P., & Forster, P. M. (2004). The semi-direct aerosol effect: Impact of absorbing aerosols on marine stratocumulus. *Quarterly Journal of the Royal Meteorological Society*, 130(599), 1407-1422. doi:10.1256/qj.03.61

- Johnston, F. H., Henderson, S. B., Chen, Y., Randerson, J. T., Marlier, M., Defries, R. S., . . . Brauer, M. (2012). Estimated global mortality attributable to smoke from landscape fires. *Environ Health Perspect*, *120*(5), 695-701. doi:10.1289/ehp.1104422
- Jones, C. R., Bretherton, C. S., & Leon, D. (2011). Coupled vs. decoupled boundary layers in VOCALS-REx. *Atmospheric Chemistry and Physics*, *11*(14), 7143-7153. doi:10.5194/acp-11-7143-2011
- 5 Kaufman, Y. J., Fraser, R. S., & Mahoney, R. L. (1991). Fossil Fuel and Biomass Burning Effect on Climate—Heating or Cooling? *Journal of Climate*, *4*(6), 578-588. doi:10.1175/1520-0442(1991)004<0578:ffabbe>2.0.co;2
- Klein, S. A., & Hartmann, D. L. (1993). The Seasonal Cycle of Low Stratiform Clouds. *Journal of Climate*, *6*, 1587-1606.
- Koch, D., & Del Genio, A. D. (2010). Black carbon semi-direct effects on cloud cover: review and synthesis. *Atmospheric Chemistry and Physics*, *10*(16), 7685-7696. doi:10.5194/acp-10-7685-2010
- 10 Liu, X., Huey, L. G., Yokelson, R. J., Selimovic, V., Simpson, I. J., Müller, M., . . . Wolfe, G. M. (2017). Airborne measurements of western U.S. wildfire emissions: Comparison with prescribed burning and air quality implications. *Journal of Geophysical Research: Atmospheres*, *122*(11), 6108-6129. doi:10.1002/2016jd026315
- Lu, Z., Liu, X., Zhang, Z., Zhao, C., Meyer, K., Rajapakshe, C., . . . Penner, J. E. (2018). Biomass smoke from southern Africa can significantly enhance the brightness of stratocumulus over the southeastern Atlantic Ocean. *Proc Natl Acad Sci U S A*, *115*(12), 2924-2929. doi:10.1073/pnas.1713703115
- 15 Martin, G. M., Johnson, D. W., & Spice, A. (1994). The Measurement and Parameterization of Effective Radius of Droplets in Warm Stratocumulus Clouds. *Journal of the Atmospheric Sciences*, *51*(13), 1823-1842.
- Mauger, G. S., & Norris, J. R. (2010). Assessing the Impact of Meteorological History on Subtropical Cloud Fraction. *Journal of Climate*, *23*(11), 2926-2940. doi:10.1175/2010jcli3272.1
- 20 Mohrman, J., Wood, R., McGibbon, J., Eastman, R., & Luke, E. (2017). Drivers of seasonal variability in marine boundary layer aerosol number concentration investigated using a steady-state approach. *Journal of Geophysical Research: Atmospheres*. doi:10.1002/2017jd027443
- Nakajima, T., Higurashi, A., Kawamoto, K., & Penner, J. E. (2001). A possible correlation between satellite-derived cloud and aerosol microphysical parameters. *Geophysical Research Letters*, *28*(7), 1171-1174. doi:10.1029/2000gl012186
- 25 Nakajima, T., & King, M. D. (1990). Determination of the Optical Thickness and Effective Particle Radius of Clouds from Reflected Solar Radiation Measurements. Part I: Theory. *Journal of the Atmospheric Sciences*, *47*(15), 1878-1893. doi:10.1175/1520-0469(1990)047<1878:dotota>2.0.co;2
- ORACLES Science Team: Aerosol, cloud and related data acquired aboard P3 during ORACLES 2016, Version 1, NASA Ames Earth Science Project Office, [http://dx.doi.org/10.5067/SUBORBITAL/ORACLES/P3/2016\\_V1\\_2017](http://dx.doi.org/10.5067/SUBORBITAL/ORACLES/P3/2016_V1_2017)
- 30 Painemal, D., Kato, S., & Minnis, P. (2014). Boundary layer regulation in the southeast Atlantic cloud microphysics during the biomass burning season as seen by the A-train satellite constellation. *Journal of Geophysical Research: Atmospheres*, *119*, 11288-11302. doi:10.1002/2014JD022182

- Painemal, D., Minnis, P., Ayers, J. K., & O'Neill, L. (2012). GOES-10 microphysical retrievals in marine warm clouds: Multi-instrument validation and daytime cycle over the southeast Pacific. *Journal of Geophysical Research: Atmospheres*, *117*(D19), D19212. doi:10.1029/2012jd017822
- Painemal, D., & Zuidema, P. (2011). Assessment of MODIS cloud effective radius and optical thickness retrievals over the Southeast Pacific with VOCALS-REx in situ measurements. *Journal of Geophysical Research: Atmospheres*, *116*(D24), D24206. doi:10.1029/2011jd016155
- Rajapakshe, C., Zhang, Z., Yorks, J. E., Yu, H., Tan, Q., Meyer, K., . . . Winker, D. M. (2017). Seasonally transported aerosol layers over southeast Atlantic are closer to underlying clouds than previously reported. *Geophysical Research Letters*, *44*(11), 5818-5825. doi:10.1002/2017gl073559
- 10 Roberts, G. C., & Nenes, A. (2005). A Continuous-Flow Streamwise Thermal-Gradient CCN Chamber for Atmospheric Measurements. *Aerosol Science and Technology*, *39*(3), 206-221. doi:10.1080/027868290913988
- Roberts, G., Wooster, M. J., & Lagoudakis, E. (2009). Annual and diurnal african biomass burning temporal dynamics. *Biogeosciences*, *6*, 849-866.
- Saide, P. E., Thompson, G., Eidhammer, T., da Silva, A. M., Pierce, R. B., & Carmichael, G. R. (2016). Assessment of biomass burning smoke influence on environmental conditions for multiyear tornado outbreaks by combining aerosol-aware microphysics and fire emission constraints. *Journal of Geophysical Research: Atmospheres*, *121*, 10294-10311. doi:10.1002/2016JD025056
- 15 Sakaeda, N., Wood, R., & Rasch, P. J. (2011). Direct and semidirect aerosol effects of southern African biomass burning aerosol. *Journal of Geophysical Research*, *116*(D12). doi:10.1029/2010jd015540
- 20 Schwarz, J. P., Gao, R. S., Fahey, D. W., Thomson, D. S., Watts, L. A., Wilson, J. C., . . . Aikin, K. C. (2006). Single-particle measurements of midlatitude black carbon and light-scattering aerosols from the boundary layer to the lower stratosphere. *Journal of Geophysical Research*, *111*, D16207. doi:10.1029/2006jd007076
- Schwarz, J. P., Spackman, J. R., Gao, R. S., Perring, A. E., Cross, E., Onasch, T. B., . . . Fahey, D. W. (2010). The Detection Efficiency of the Single Particle Soot Photometer. *Aerosol Science and Technology*, *44*(8), 612-628. doi:10.1080/02786826.2010.481298
- 25 Seabold, S., & Perktold, J. (2010). Statsmodels: Econometric and Statistical Modeling with Python. *Proceedings of the 9th Python in Science Conference*.
- Seager, R., Murtugudde, R., Naik, N., Clement, A., Gordon, N., & Miller, J. (2003). Air-Sea Interaction and the Seasonal Cycle of the Subtropical Anticyclones. *Journal of Climate*, *16*, 1948-1966.
- 30 Shank, L. M., Howell, S., Clarke, A. D., Freitag, S., Brekhovskikh, V., Kapustin, V., . . . Wood, R. (2012). Organic matter and non-refractory aerosol over the remote Southeast Pacific: oceanic and combustion sources. *Atmospheric Chemistry and Physics*, *12*(1), 557-576. doi:10.5194/acp-12-557-2012

- Simpson, R. M. C., Howell, S. G., Blomquist, B. W., Clarke, A. D., & Huebert, B. J. (2014). Dimethyl sulfide: Less important than long-range transport as a source of sulfate to the remote tropical Pacific marine boundary layer. *Journal of Geophysical Research: Atmospheres*, 119(14), 9142-9167. doi:10.1002/2014jd021643
- Smalley, M., & L'Ecuyer, T. (2015). A Global Assessment of the Spatial Distribution of Precipitation Occurrence. *Journal of Applied Meteorology and Climatology*, 54(11), 2179-2197. doi:10.1175/jamc-d-15-0019.1
- Stein, A. F., Draxler, R. R., Rolph, G. D., Stunder, B. J. B., Cohen, M. D., & Ngan, F. (2015). NOAA's HYSPLIT Atmospheric Transport and Dispersion Modeling System. *Bulletin of the American Meteorological Society*, 96(12), 2059-2077. doi:10.1175/bams-d-14-00110.1
- Stephens, M., Turner, N., & Sandberg, J. (2003). Particle identification by laser-induced incandescence in a solid-state laser cavity. *Applied Optics*, 42(19), 3726-3736.
- Thompson, G., & Eidhammer, T. (2014). A Study of Aerosol Impacts on Clouds and Precipitation Development in a Large Winter Cyclone. *Journal of the Atmospheric Sciences*, 71(10), 3636-3658. doi:10.1175/jas-d-13-0305.1
- Twomey, S. (1974). Pollution and the Planetary Albedo. *Atmospheric Environment*, 8, 1251-1256.
- van der Werf, G. R., Randerson, J. T., Giglio, L., Collatz, G. J., Mu, M., Kasibhatla, P. S., . . . van Leeuwen, T. T. (2010). Global fire emissions and the contribution of deforestation, savanna, forest, agricultural, and peat fires (1997–2009). *Atmospheric Chemistry and Physics*, 10(23), 11707-11735. doi:10.5194/acp-10-11707-2010
- Wilcox, E. M. (2010). Stratocumulus cloud thickening beneath layers of absorbing smoke aerosol. *Atmospheric Chemistry and Physics*, 10(23), 11769-11777. doi:10.5194/acp-10-11769-2010
- Wilcox, E. M. (2012). Direct and semi-direct radiative forcing of smoke aerosols over clouds. *Atmospheric Chemistry and Physics*, 12(1), 139-149. doi:10.5194/acp-12-139-2012
- Wilcox, E. M., Harshvardhan, & Platnick, S. (2009). Estimate of the impact of absorbing aerosol over cloud on the MODIS retrievals of cloud optical thickness and effective radius using two independent retrievals of liquid water path. *Journal of Geophysical Research*, 114(D5). doi:10.1029/2008jd010589
- Wood, R. (2006). Rate of loss of cloud droplets by coalescence in warm clouds. *Journal of Geophysical Research*, 111(D21). doi:10.1029/2006jd007553
- Wood, R. (2007). Cancellation of Aerosol Indirect Effects in Marine Stratocumulus through Cloud Thinning. *Journal of the Atmospheric Sciences*, 64(7), 2657-2669. doi:10.1175/jas3942.1
- Wood, R., & Bretherton, C. S. (2004). Boundary Layer Depth, Entrainment, and Decoupling in the Cloud-Capped Subtropical and Tropical Marine Boundary Layer. *Journal of Climate*, 17, 3576-3588.
- Wood, R., Leon, D., Lebsock, M., Snider, J., & Clarke, A. D. (2012). Precipitation driving of droplet concentration variability in marine low clouds. *Journal of Geophysical Research: Atmospheres*, 117(D19). doi:10.1029/2012jd018305
- Yamaguchi, T., Feingold, G., Kazil, J., & McComiskey, A. (2015). Stratocumulus to cumulus transition in the presence of elevated smoke layers. *Geophysical Research Letters*, 42(23), 10478-10485. doi:10.1002/2015gl066544

Zhou, X., Ackerman, A. S., Fridlind, A. M., Wood, R., & Kollias, P. (2017). Impacts of solar-absorbing aerosol layers on the transition of stratocumulus to trade cumulus clouds. *Atmospheric Chemistry and Physics*, 17(20), 12725-12742. doi:10.5194/acp-17-12725-2017

5 Zuidema, P., Redemann, J., Haywood, J., Wood, R., Piketh, S., Hipondoka, M., & Formenti, P. (2016). Smoke and Clouds above the Southeast Atlantic: Upcoming Field Campaigns Probe Absorbing Aerosol's Impact on Climate. *Bulletin of the American Meteorological Society*, 97(7), 1131-1135. doi:10.1175/bams-d-15-00082.1

Zuidema, P., Sedlacek Iii, A. J., Flynn, C., Springston, S., Delgadillo, R., Zhang, J., . . . Muradyan, P. (2018). The Ascension Island boundary layer in the remote southeast Atlantic is often smoky. *Geophysical Research Letters*. doi:10.1002/2017gl076926

10



**Tables**

**Table 1. Coefficient of determination ( $R^2$ ), regression coefficients ( $\beta$ ), and intercepts for all OLS regressions. Values reported as means with 95% confidence interval in parentheses as determined via bootstrapping.**

| Row | Figure    | y                   | x <sub>1</sub>     | x <sub>2</sub>     | x <sub>3</sub> | x <sub>4</sub> | R <sup>2</sup>      | $\beta_1$           | $\beta_2$             | $\beta_3$            | $\beta_4$           | intercept           |
|-----|-----------|---------------------|--------------------|--------------------|----------------|----------------|---------------------|---------------------|-----------------------|----------------------|---------------------|---------------------|
| 1   | Fig. 1(a) | ln(N <sub>d</sub> ) | ln(CCN)            | -                  | -              | -              | 0.73<br>(0.50–0.89) | 0.45<br>(0.31–0.60) | -                     | -                    | -                   | 3.08<br>(2.26–3.86) |
| 2   | Fig. 1(b) | ln(N <sub>d</sub> ) | ln(CCN)            | -                  | -              | -              | 0.32<br>(0.01–0.74) | 0.16<br>(0.02–0.30) | -                     | -                    | -                   | 4.54<br>(3.67–5.39) |
| 3   | Fig. 2(a) | N <sub>d</sub>      | BC SO <sub>4</sub> | AC SO <sub>4</sub> | BC rBC         | AC rBC         | 0.70<br>(0.51–0.85) | 76<br>(47–109)      | -47<br>(-111–-2)      | 0.82<br>(-0.18–2.33) | 0.24<br>(0.00–0.48) | 115<br>(77–156)     |
| 4   | Fig. 2(b) | N <sub>d</sub>      | BC SO <sub>4</sub> | AC SO <sub>4</sub> | -              | -              | 0.52<br>(0.26–0.74) | 74<br>(55–99)       | 5<br>(-14–25)         | -                    | -                   | 143<br>(95–196)     |
| 5   | Fig. 2(c) | N <sub>d</sub>      | BC rBC             | AC rBC             | -              | -              | 0.38<br>(0.12–0.63) | 2.10<br>(0.78–3.76) | -0.08<br>(-0.41–0.19) | -                    | -                   | 184<br>(141–226)    |
| 6   | Fig. 2(d) | N <sub>d</sub>      | BC SO <sub>4</sub> | BC rBC             | -              | -              | 0.61<br>(0.40–0.79) | 63<br>(34–94)       | 0.86<br>(0.05–1.80)   | -                    | -                   | 121<br>(81–162)     |
| 7   | Fig. 2(e) | N <sub>d</sub>      | AC SO <sub>4</sub> | AC rBC             | -              | -              | 0.16<br>(0.03–0.36) | 35<br>(-16–99)      | 0.03<br>(-0.23–0.34)  | -                    | -                   | 216<br>(171–260)    |

5

10

**Table 2. Starting and ending latitude, longitude, and time for all the flight legs from the 31 August and 4 September cases used in Fig. 3, 4, and 6.**

| Name                                 | Start latitude (°) | End latitude (°) | Start longitude (°) | End longitude (°) | Start UTC Time | End UTC Time |
|--------------------------------------|--------------------|------------------|---------------------|-------------------|----------------|--------------|
| <b>31 August 2016 (PRF02-2016)</b>   |                    |                  |                     |                   |                |              |
| RMP1                                 | -22.3              | -21.5            | 12.5                | 11.5              | 08:27          | 08:46        |
| CLD1                                 | -17.8              | -18.2            | 7.6                 | 8.0               | 13:58          | 14:07        |
| SQS1                                 | -17.2              | -17.2            | 7.0                 | 7.0               | 13:14          | 13:45        |
| RMP2                                 | -17.5              | -16.5            | 7.3                 | 6.2               | 10:06          | 10:26        |
| CLD2                                 | -15.7              | -15.2            | 5.5                 | 5.0               | 10:40          | 10:50        |
| SAW1                                 | -13.9              | -14.9            | 3.7                 | 4.7               | 12:14          | 12:35        |
| CLD3                                 | -13.4              | -13.6            | 3.2                 | 3.5               | 12:04          | 12:09        |
| SQS2                                 | -12.8              | -13.0            | 2.6                 | 2.8               | 11:33          | 11:55        |
| <b>4 September 2016 (PRF04-2016)</b> |                    |                  |                     |                   |                |              |
| RMP1                                 | -19.9              | -19.2            | 9.9                 | 9.1               | 08:50          | 09:03        |
| CLD1                                 | -18.8              | -18.3            | 8.6                 | 8.1               | 09:12          | 09:21        |
| RMP2                                 | -17.7              | -16.9            | 7.5                 | 6.7               | 09:33          | 09:49        |
| RMP3                                 | -14.7              | -14.2            | 4.5                 | 4.0               | 10:29          | 10:38        |
| CLD2                                 | -13.7              | -13.2            | 3.5                 | 3.1               | 10:48          | 10:56        |
| RMP4                                 | -12.6              | -11.9            | 2.4                 | 1.8               | 11:09          | 11:22        |

Figures

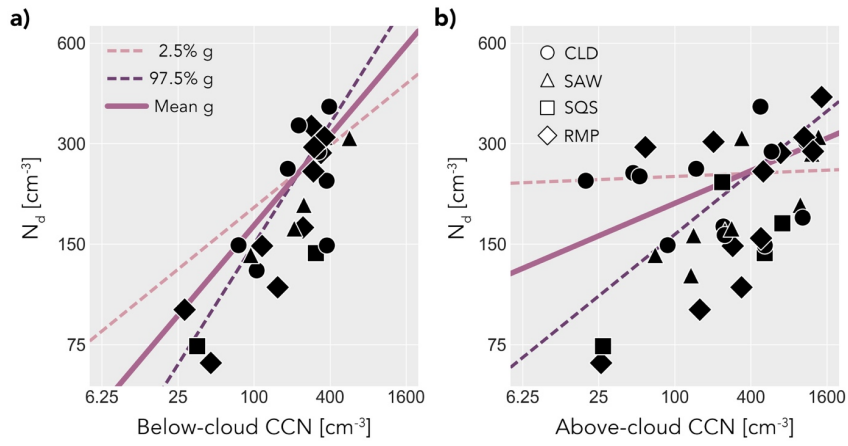

Figure 1. Scatterplots of  $N_d$  against (a) below-cloud and (b) above-cloud CCN concentration from all ORACLES-2016 flights. Solid and dashed purple lines show the mean value and 95% confidence interval of  $g$ , respectively.

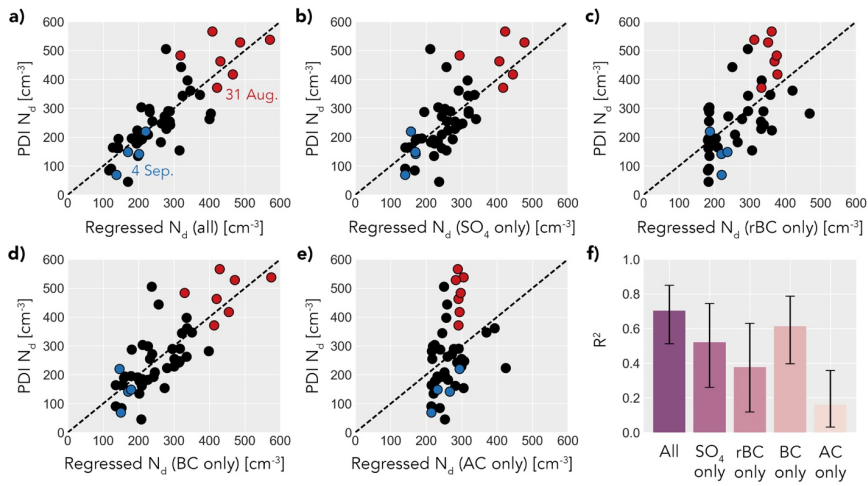

Figure 2. Scatterplot of observed  $N_d$  against  $N_d$  predicted from a regression using (a) all valid AC and BC SO<sub>4</sub> and rBC observations, (b) only SO<sub>4</sub> observations, (c) only rBC observations, (d) only BC observations, and (e) only AC observations. 31 August and 4 September flights are highlighted in red and blue, respectively. Dashed black lines show the one-to-one line. (f) Bar chart showing R<sup>2</sup> for all regressions.

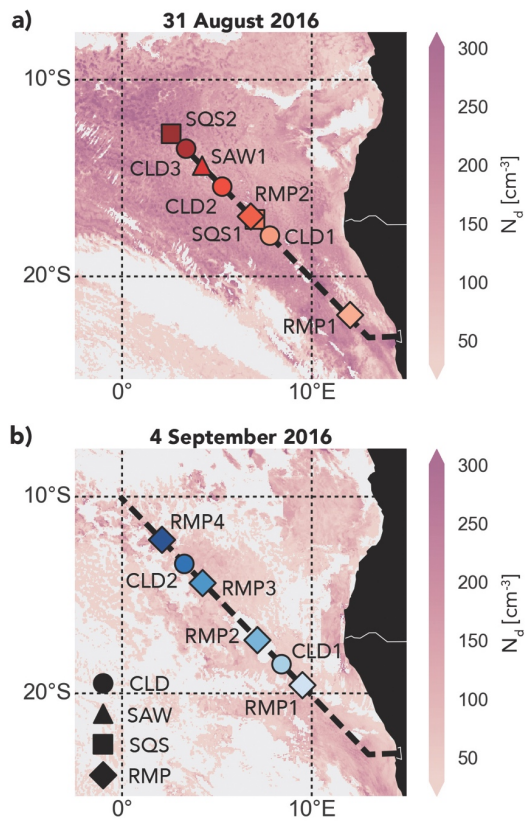

5 Figure 3. Map of the SEA region with the location of relevant flight legs for the (a) 31 August and (b) 4 September flights shown in shades of red and blue, respectively. The flight track of the P-3 for each day is given by a dashed black line. Background shading is  $N_d$  from SEVIRI (12:15 UTC) screened for MBL clouds.

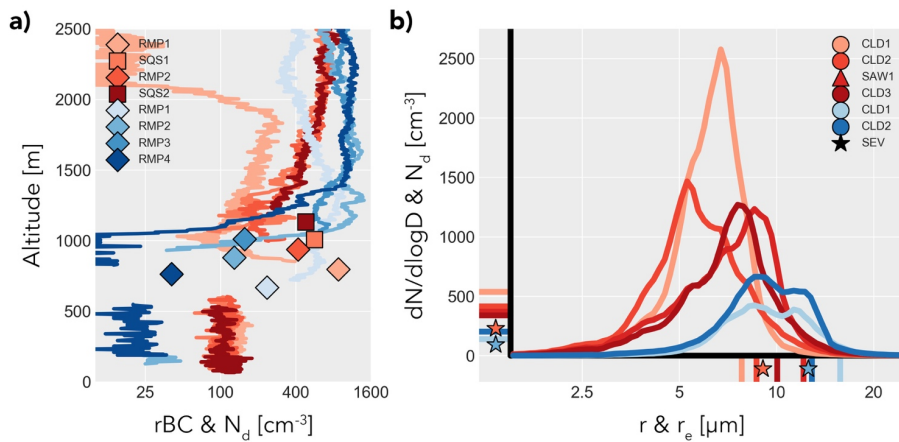

5 **Figure 4.** Cloud microphysical properties and rBC for the 31 August (reds) and 4 September (blues) flights. (a) Vertical profiles of rBC number concentration (lines) and average  $N_d$  (markers) for each profile. Vertical marker position indicates cloud top height. Note that rBC and  $N_d$  share the same x-axis because they have the same units and similar magnitudes. (b) Average cloud droplet spectra (curves),  $N_d$  (ticks on y-axis), and  $r_e$  (ticks on x-axis) for each CLD and SAW leg. Stars indicate the values of  $N_d$  and  $r_e$  from SEVIRI averaged over the 31 August (light red) and 4 September (light blue) flight paths.

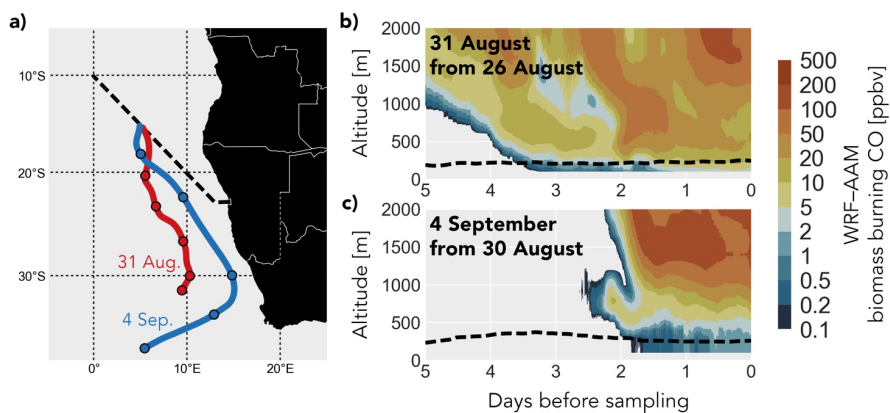

Figure 5. (a) Map of HYSPLIT MBL back trajectories for 31 August (red) and 4 September (blue). Circles are plotted every 24 hours after initialization. Curtains of WRF-AAM biomass burning tagged CO along the path of the trajectories are plotted in (b) for 31 August and c) for 4 September, with the trajectory altitude indicated by the dashed black line.

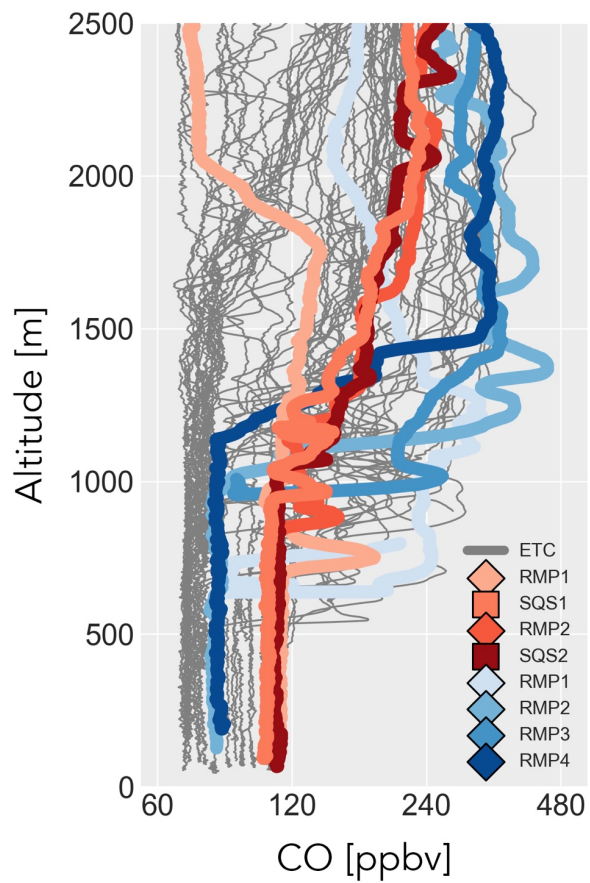

Figure 6. Vertical profiles of observed CO for all ORACLES-2016 flights (grey lines), with the profiles from 31 August and 4 September highlighted in shades of red and blue, respectively.



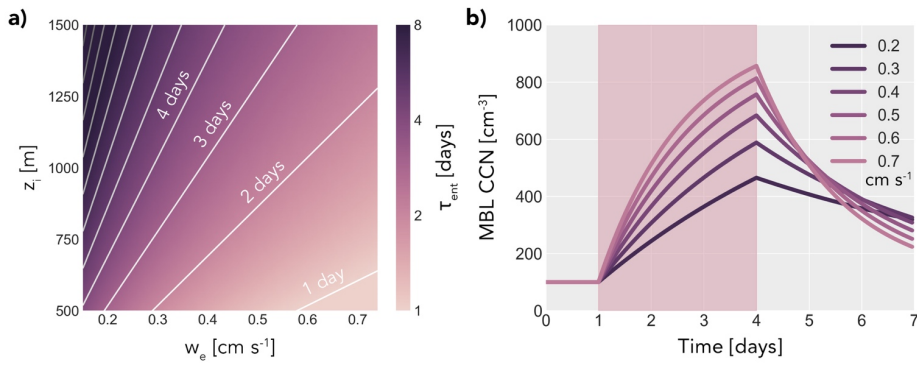

5 **Figure 7. (a) Characteristic (e-folding) entrainment mixing timescale for a range of plausible  $z_i$  and  $w_e$  values. Contours at one day intervals for reference. (b) Evolution of  $CCN_{MBL}$  over time in response to the introduction of a smoke plume with  $CCN_{FT} = 1000 \text{ cm}^{-3}$  at day 1 and its removal at day 4 (highlighted). Curves show results for a range of entrainment timescales with  $z_i = 1 \text{ km}$  and  $w_e$  varying between 0.2 and 0.7  $\text{cm s}^{-1}$ .**

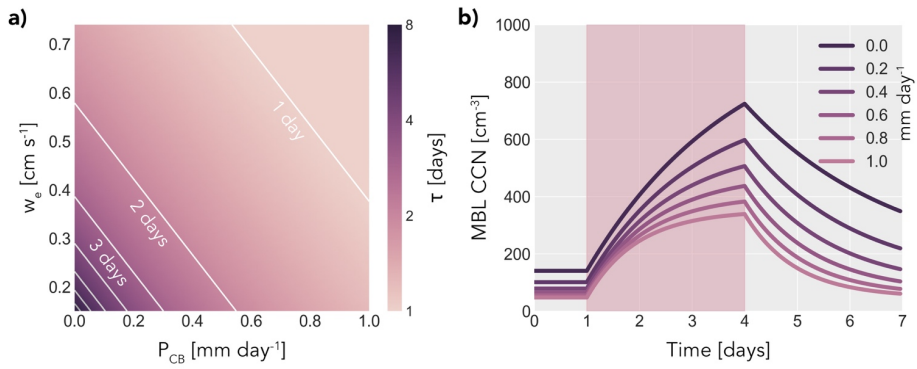

5 **Figure 8.** (a) Characteristic (e-folding) entrainment mixing timescale for a range of plausible  $w_e$  and  $P_{CB}$  values. Contours at one-day intervals for reference. (b) Evolution of  $CCN_{MBL}$  over time in response to the introduction of a smoke plume with  $CCN_{FT} = 1000$  cm<sup>-3</sup> at day 1 and its removal at day 4 (highlighted). Curves show results for a range of equilibration timescales with  $z_i = 1$  km,  $w_e = 0.4$  cm s<sup>-1</sup>,  $h = 300$  m, and  $P_{CB}$  varying between 0 and 1 mm day<sup>-1</sup>.
